# Supplementary material for: Ligand-triplet migration in iridium(iii) cyclometalates featuring π-conjugated isocyanide ligands
Source: Royal Society of Chemistry journal article supplement (doi:10.1039/d0dt02100h), 2020-01-01
Supplement: d0dt02100h1.pdf [file d0dt02100h1.pdf]

# Electronic Supporting Information for:

## Ligand-Triplet Migration in Iridium(III) Cyclometalates Featuring $\pi$ -Conjugated Isocyanide Ligands

*Joseph M Favale Jr., Cory E. Hauke, Evgeny O. Danilov, James E. Yarnell, and Felix N. Castellano\**

Department of Chemistry, North Carolina State University (NCSU), Raleigh, NC, 27695-8204,  
United States

EMAIL ADDRESS: [fncastel@ncsu.edu](mailto:fncastel@ncsu.edu)

\* To whom correspondence should be addressed. Phone: (419) 372-7513 Fax: (419) 372-9809

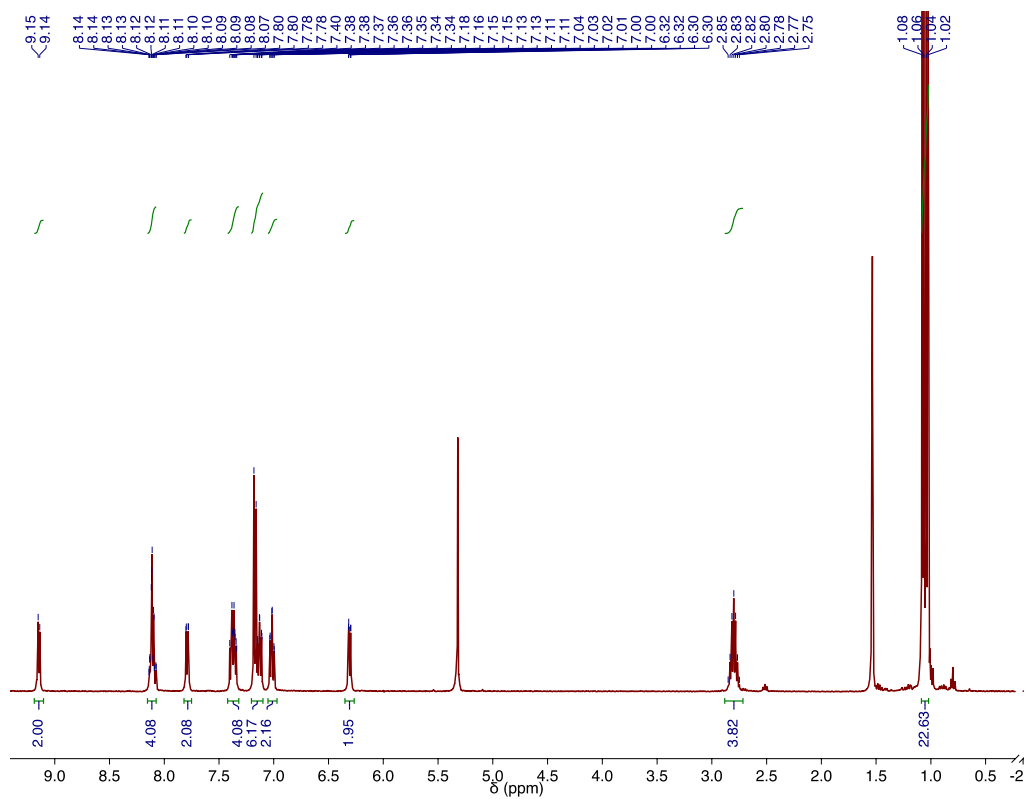

Figure S1:  $^1\text{H}$  NMR spectrum of **1** in  $\text{CD}_2\text{Cl}_2$  (400 MHz).

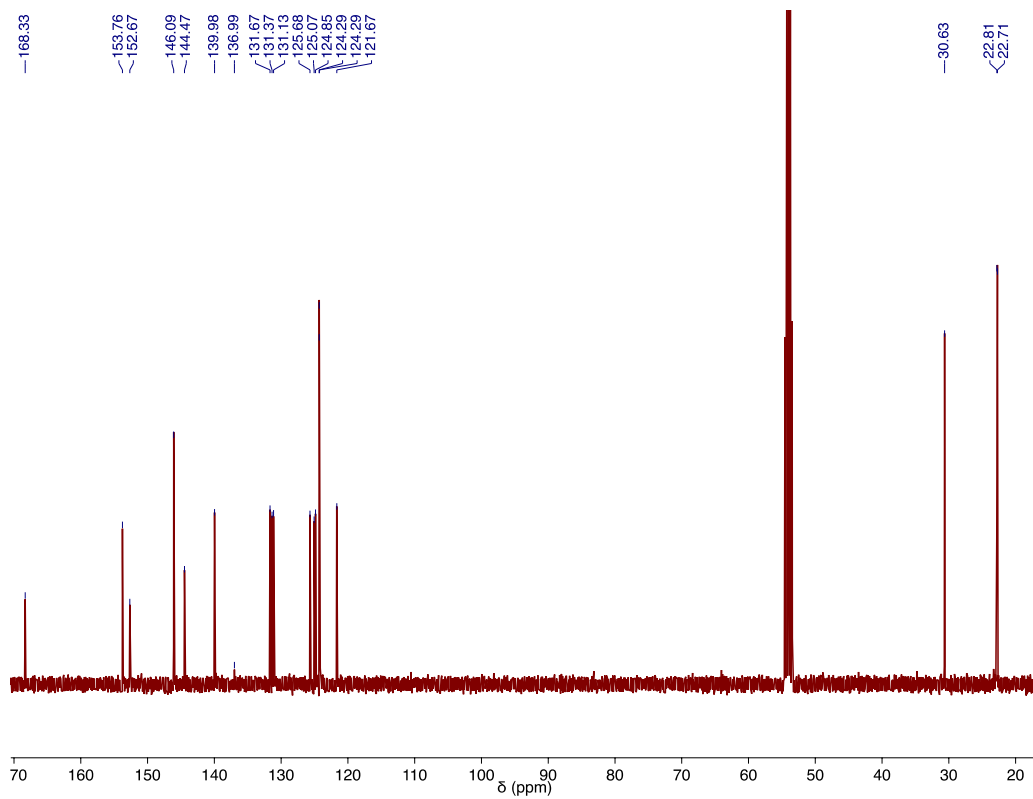

Figure S2:  $^{13}\text{C}$  NMR spectrum of **1** in  $\text{CD}_2\text{Cl}_2$  (100 MHz).

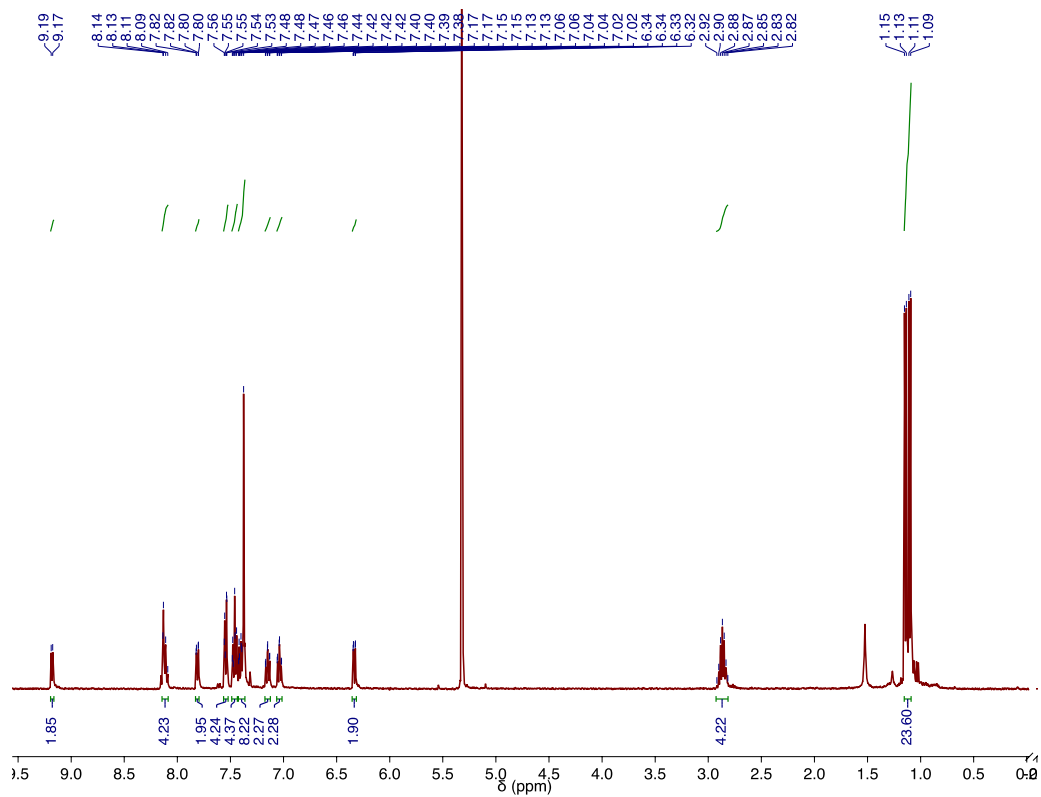

Figure S3:  $^1\text{H}$  NMR spectrum of **2** in  $\text{CD}_2\text{Cl}_2$  (400 MHz).

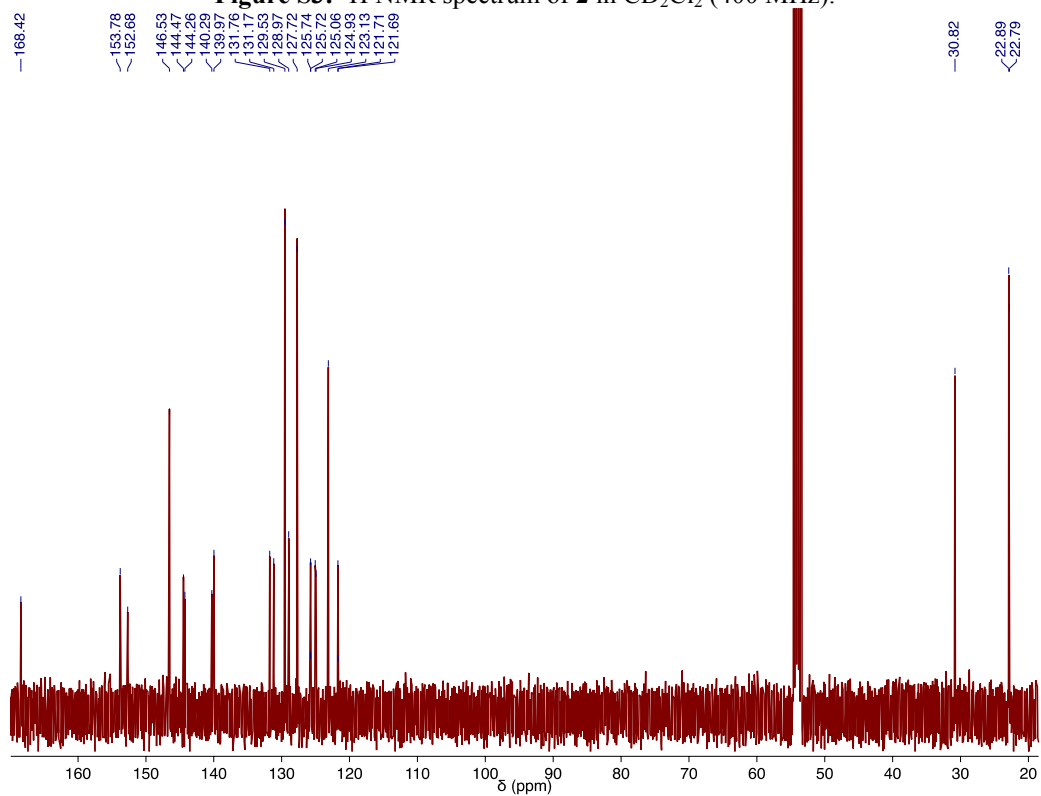

Figure S4:  $^{13}\text{C}$  NMR spectrum of **2** in  $\text{CD}_2\text{Cl}_2$  (100 MHz).

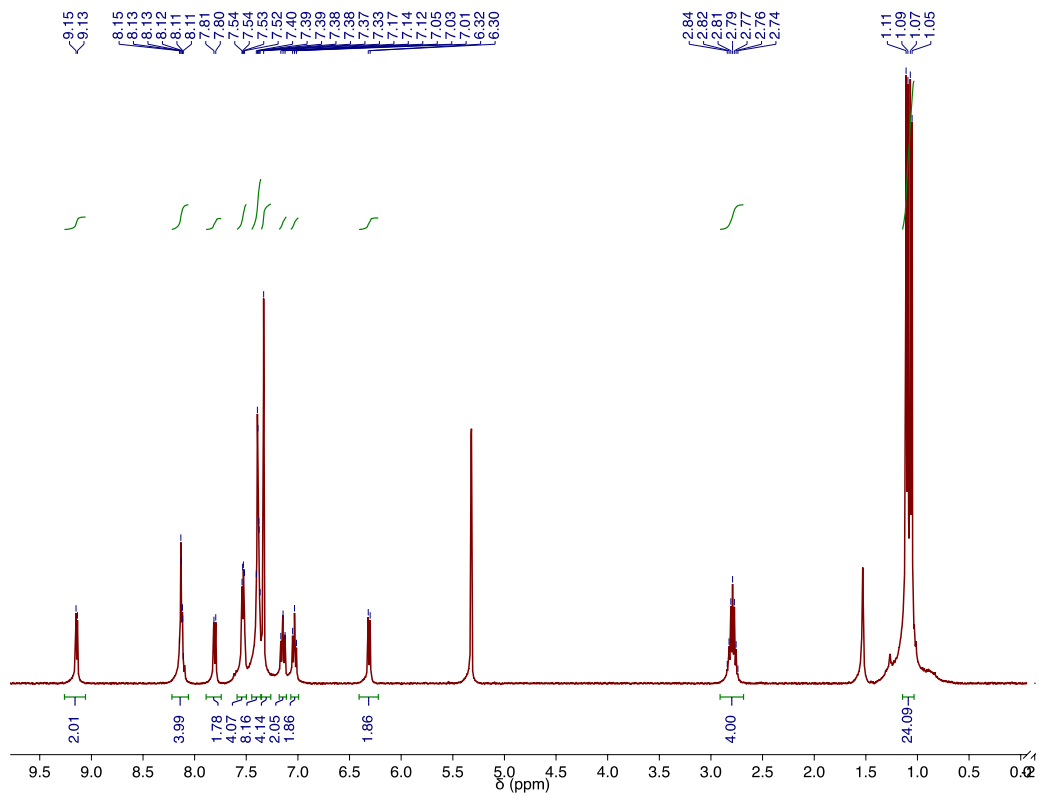

Figure S5:  $^1\text{H}$  NMR spectrum of **3** in  $\text{CD}_2\text{Cl}_2$  (400 MHz).

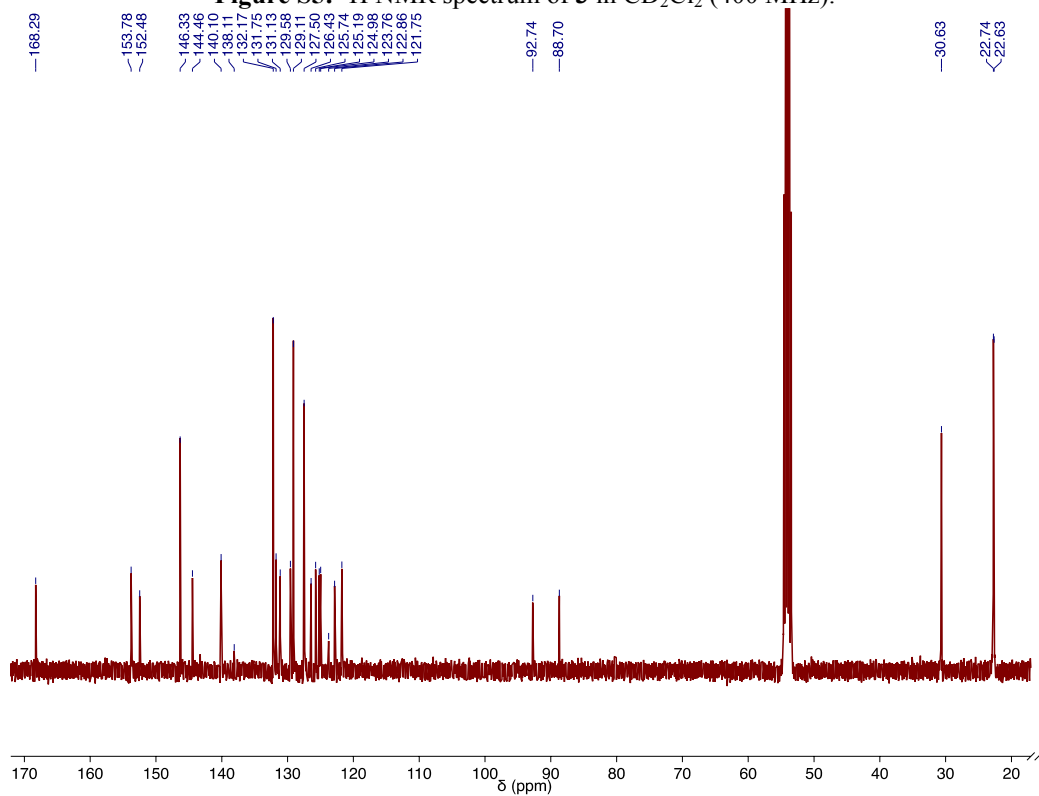

Figure S6:  $^{13}\text{C}$  NMR spectrum of **3** in  $\text{CD}_2\text{Cl}_2$  (100 MHz).

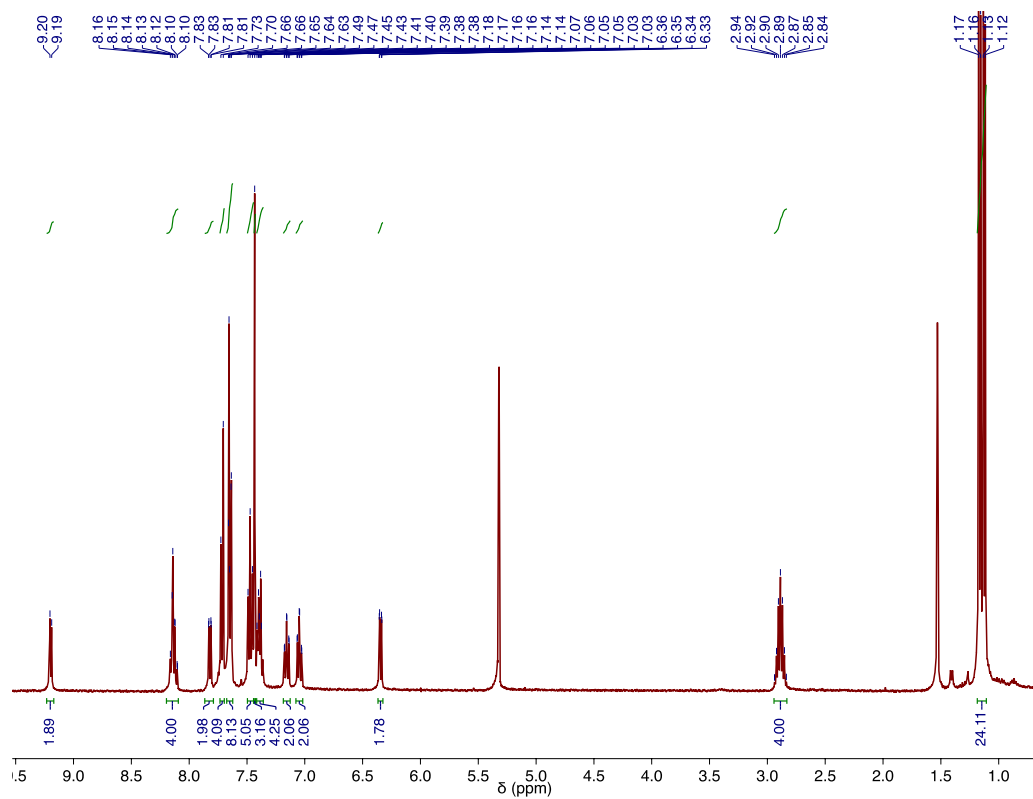

Figure S7:  $^1\text{H}$  NMR spectrum of **4** in  $\text{CD}_2\text{Cl}_2$  (400 MHz).

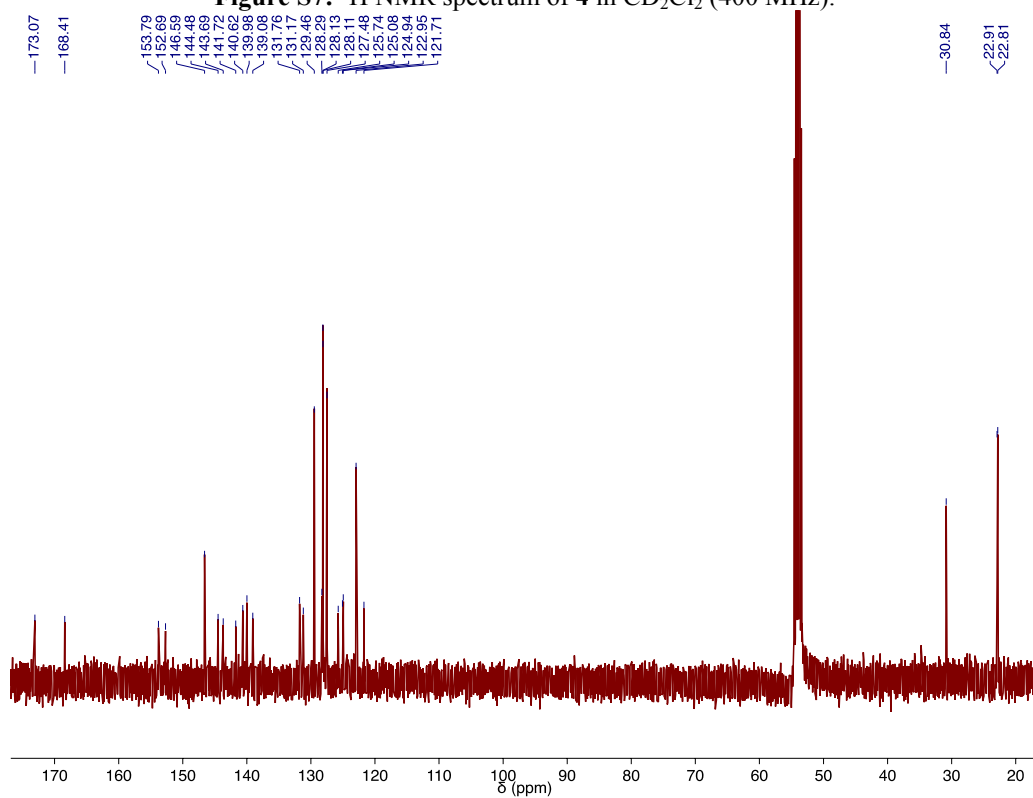

Figure S8:  $^{13}\text{C}$  NMR spectrum of **4** in  $\text{CD}_2\text{Cl}_2$  (100 MHz).

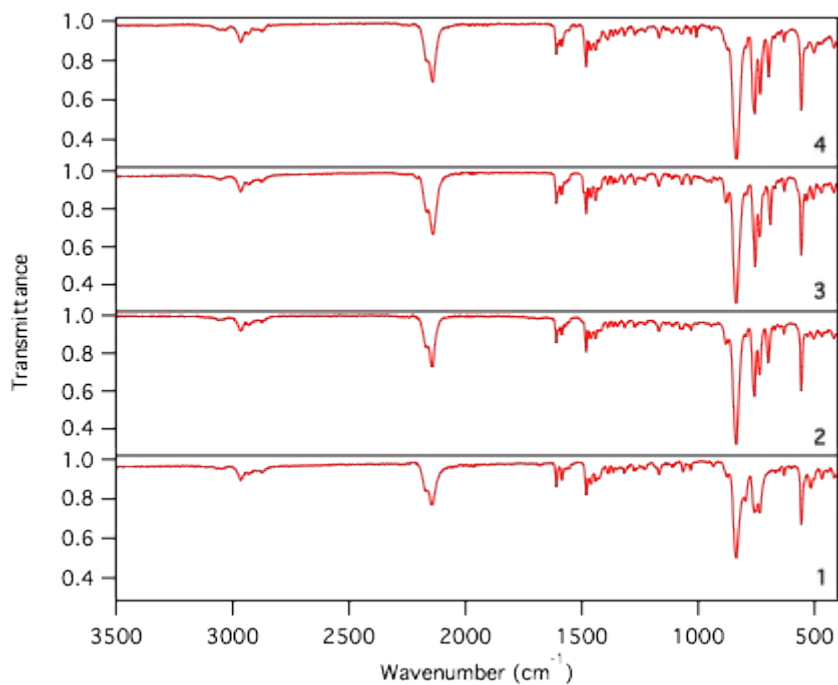

**Figure S9:** FTIR-ATR spectra of **1-4** as powders.

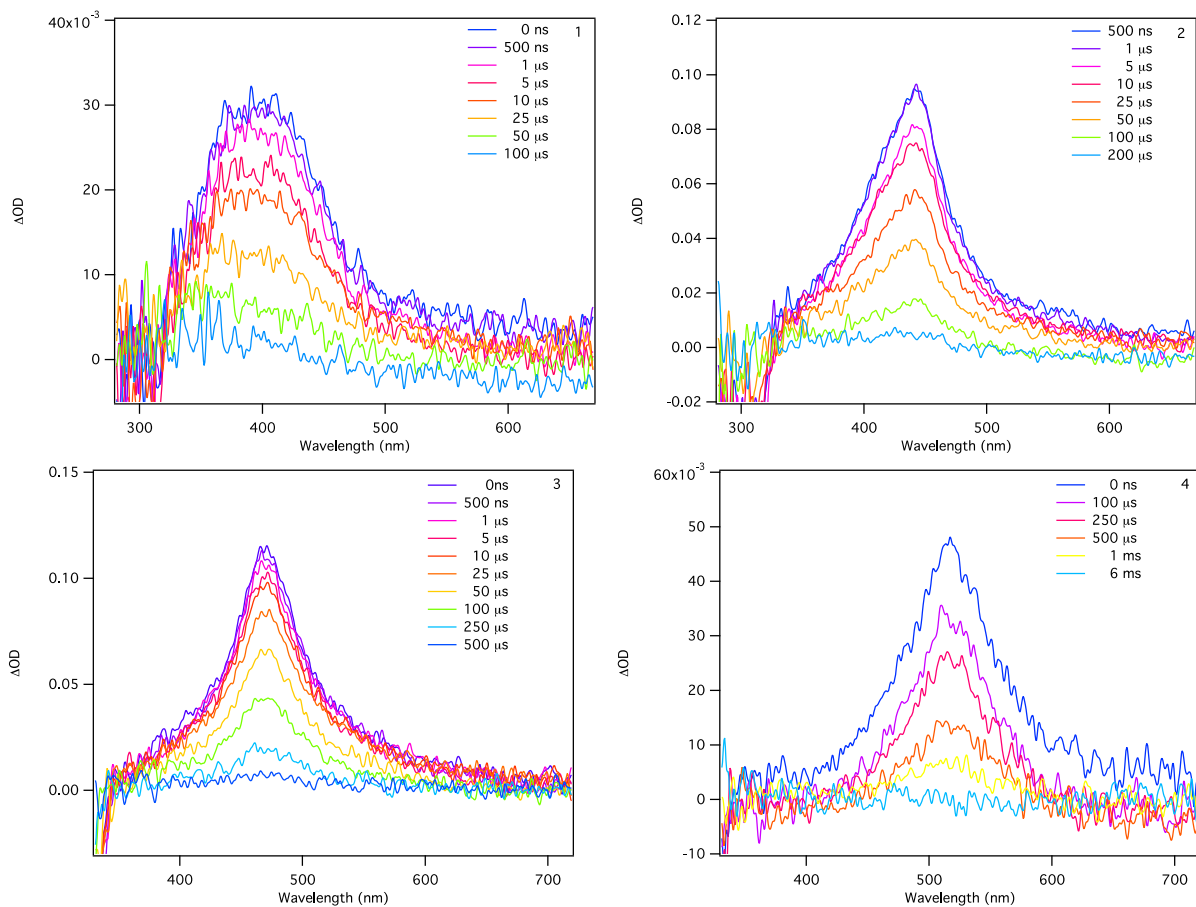

**Figure S10:** ns-TA difference spectra of **1-4** in THF. Spectra recorded using 355 nm excitation for all samples.

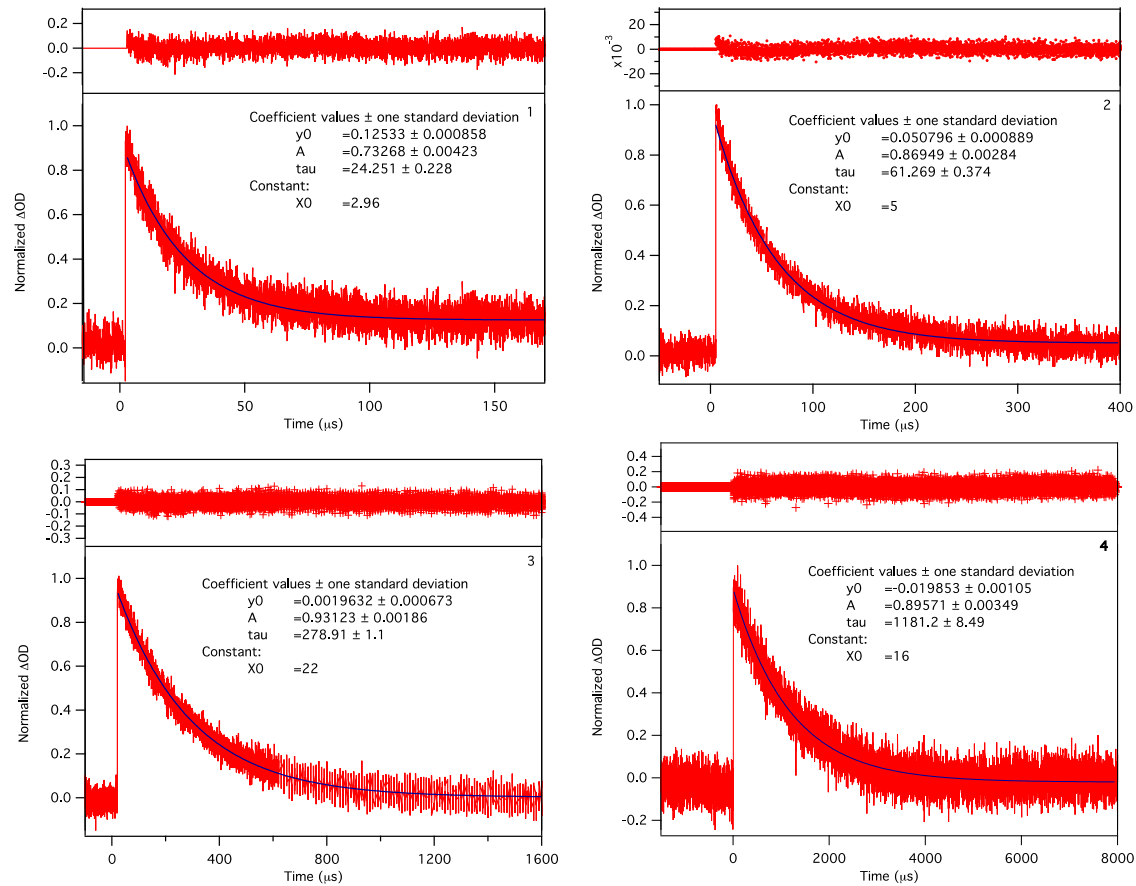

**Figure S11:** ns-TA kinetic decays of 1–4 in THF demonstrating single-exponential fits (blue). ns-TA kinetics recording of most prominent transient signals in each with 355 nm excitation for all samples. Sample of 3 measured at concentration of  $\sim 1.6 \times 10^{-6}$  M. Sample of 4 measured at concentration of  $\sim 2.5 \times 10^{-6}$  M.

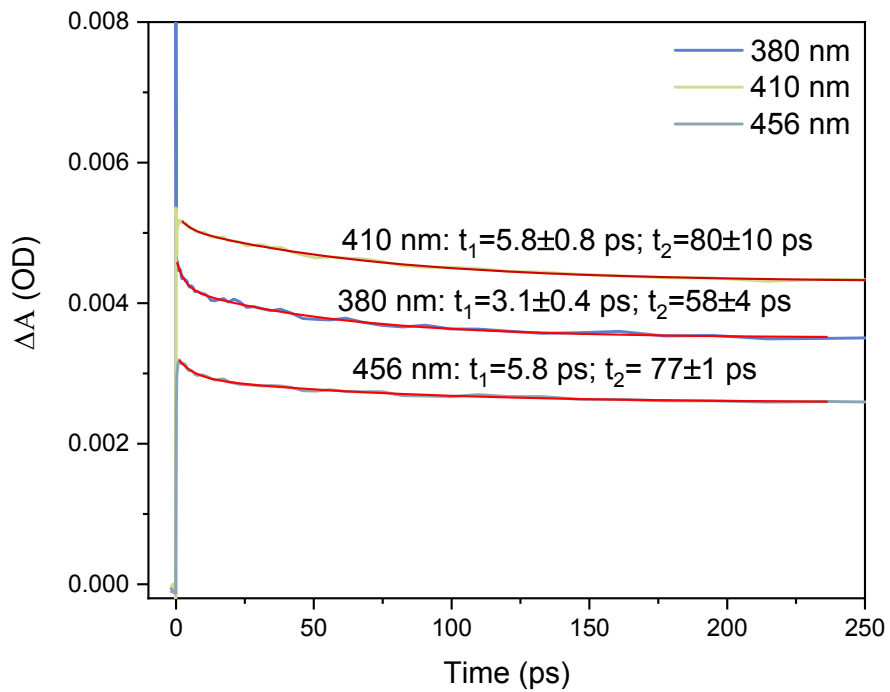

**Figure S12:** Ultrafast TA kinetics of **1** in THF measured to 250 ps.

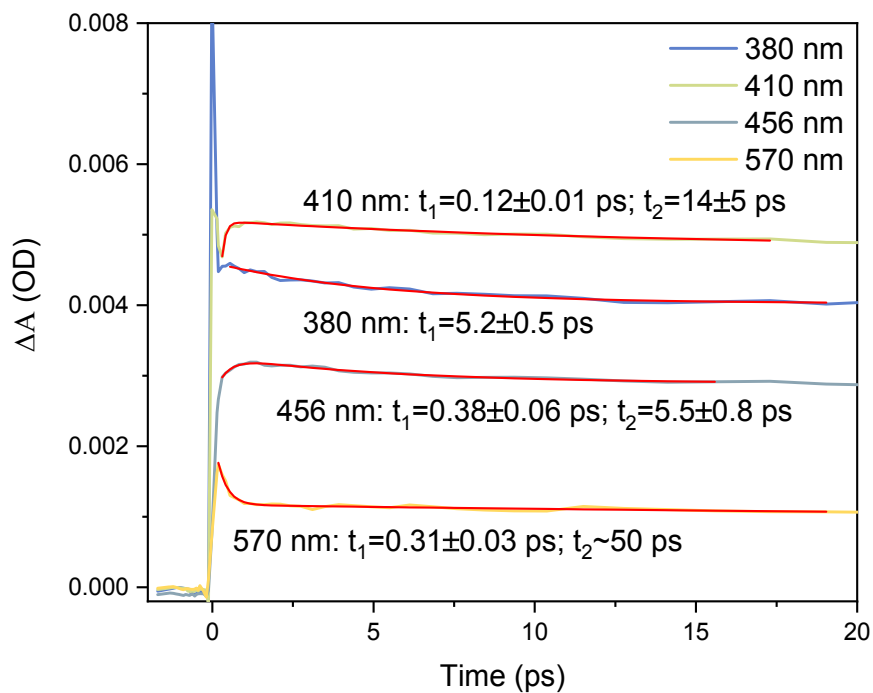

**Figure S13:** Ultrafast TA kinetics of **1** in THF measured to 20 ps.



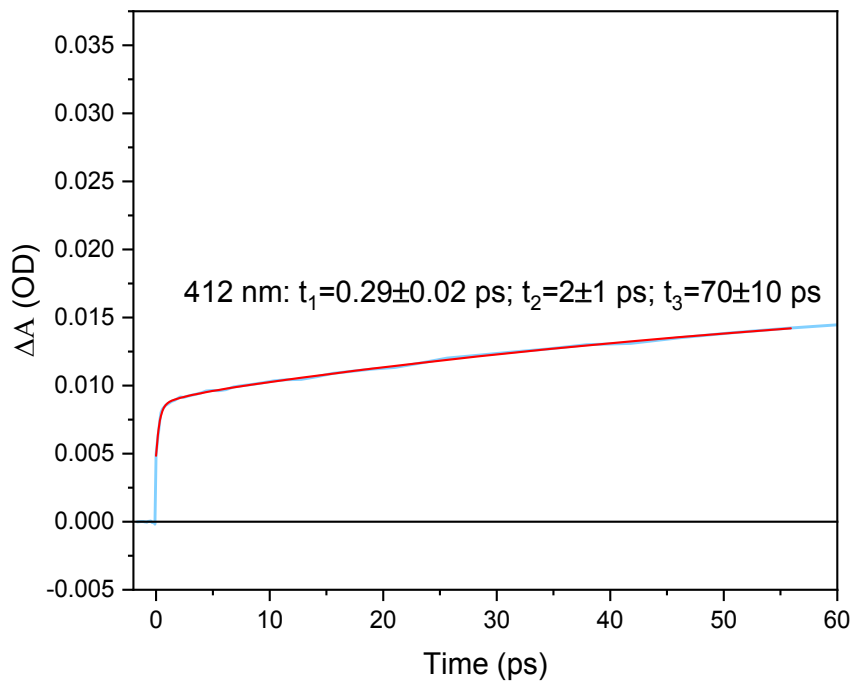

**Figure S14:** Ultrafast TA kinetics of **2** in THF measured to 60 ps.

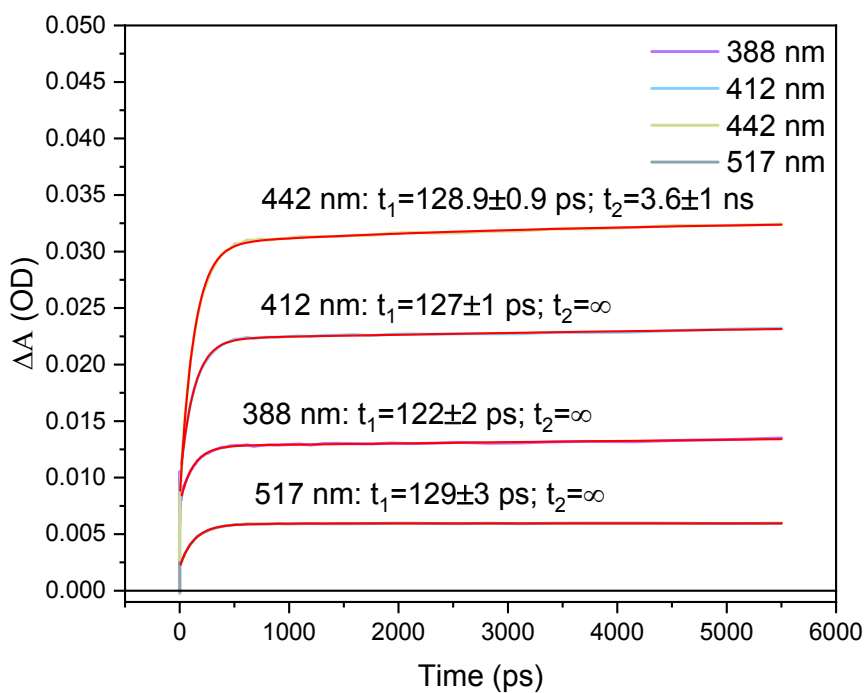

**Figure S15:** Ultrafast TA kinetics of **2** in THF measured across the complete time window (6 ns).

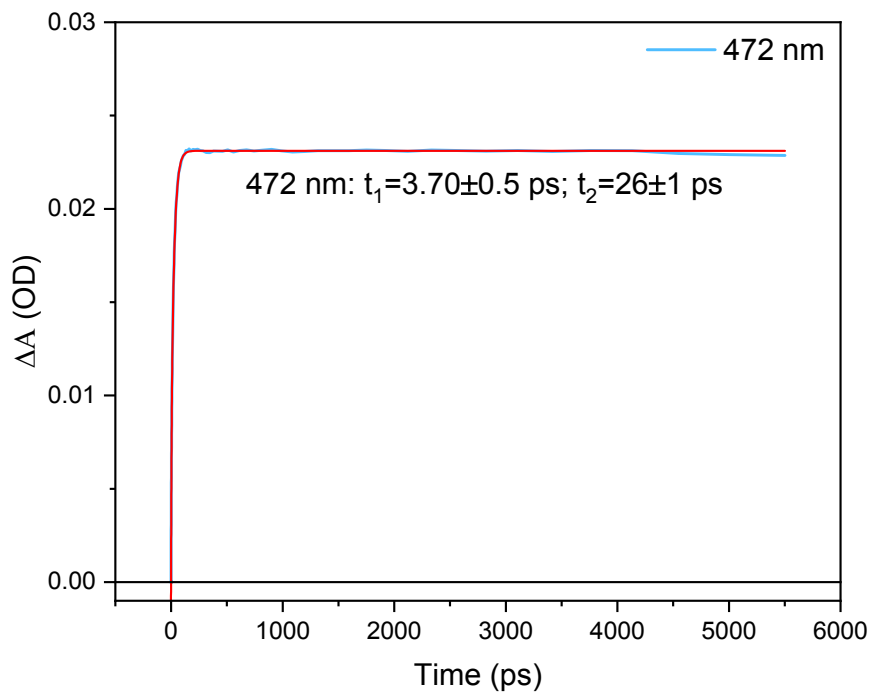

**Figure S16:** Ultrafast TA kinetics of **3** in THF measured across the complete time window (6 ns).

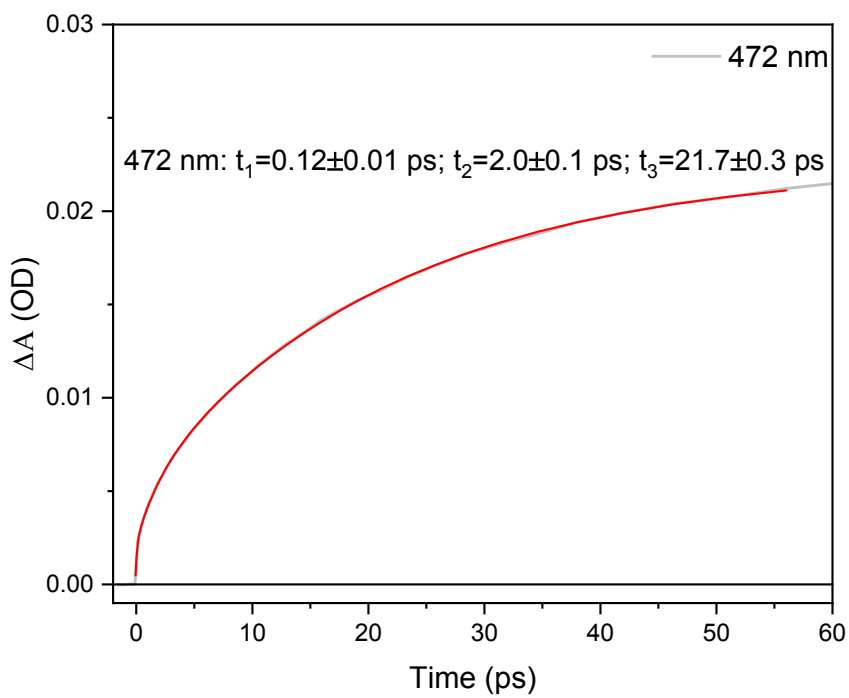

**Figure S17:** Ultrafast TA kinetics of **3** in THF measured to 60 ps.

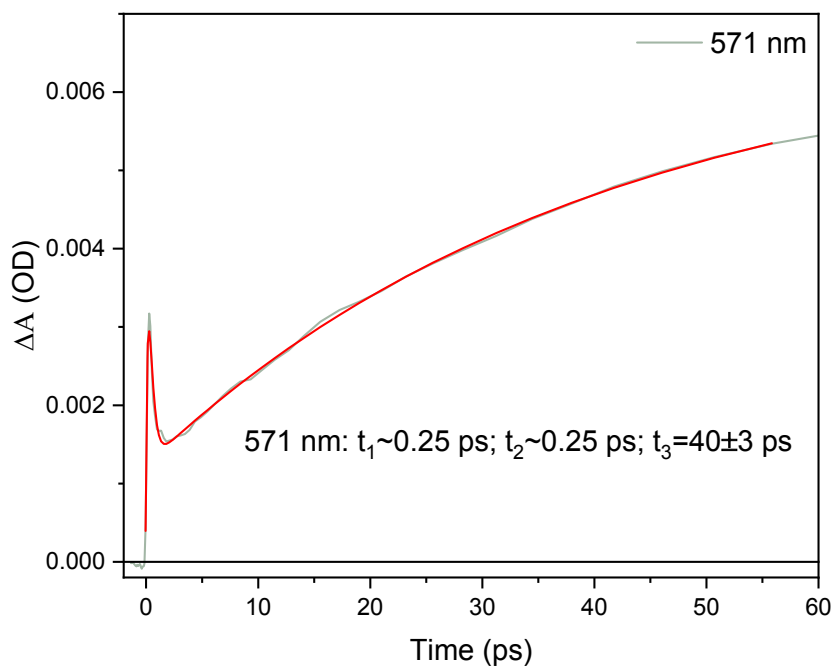

**Figure S18:** Ultrafast TA kinetics (at 571 nm) of **4** in THF measured to 60 ps.

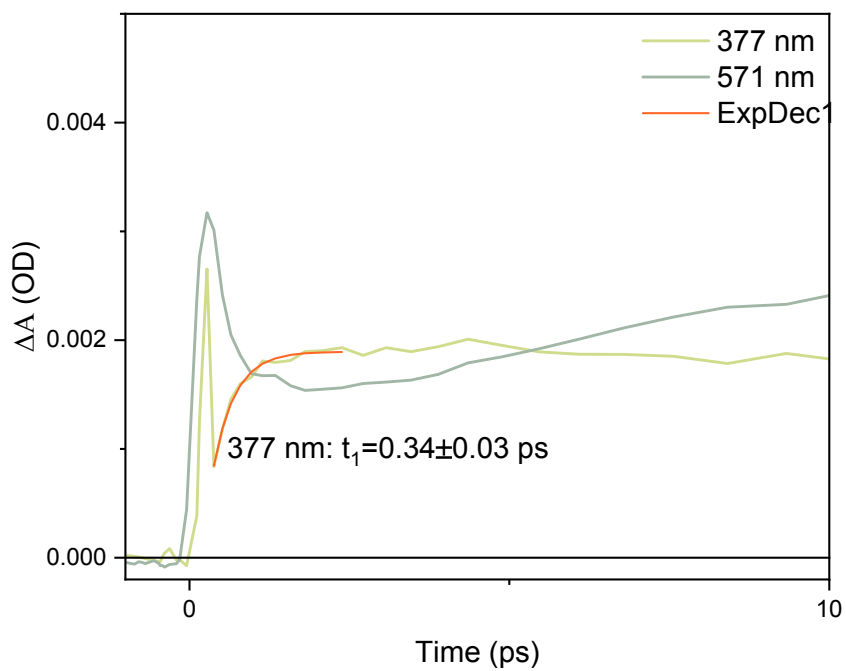

**Figure S19:** Ultrafast TA kinetics of **4** in THF measured to 10 ps.

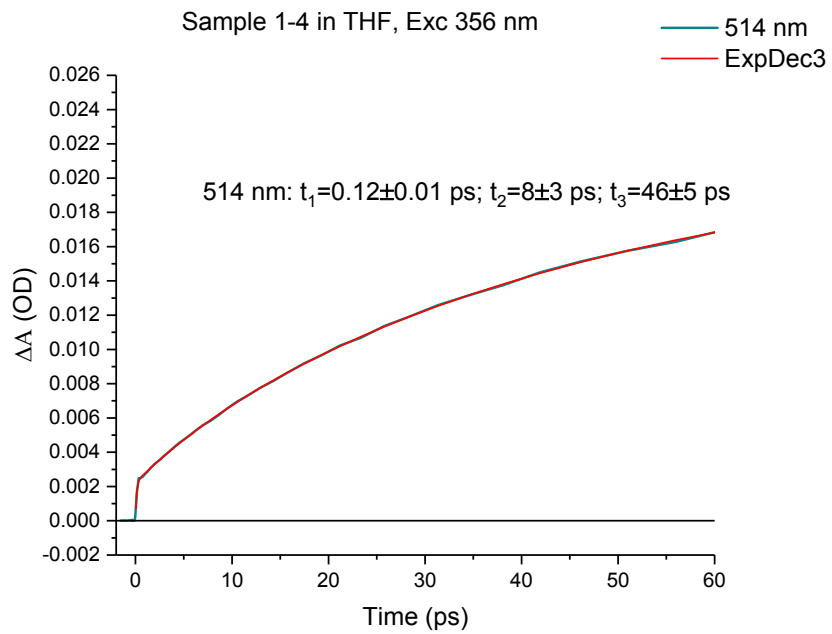

**Figure S20:** Ultrafast TA kinetics of **4** in THF measured to 600 ps.

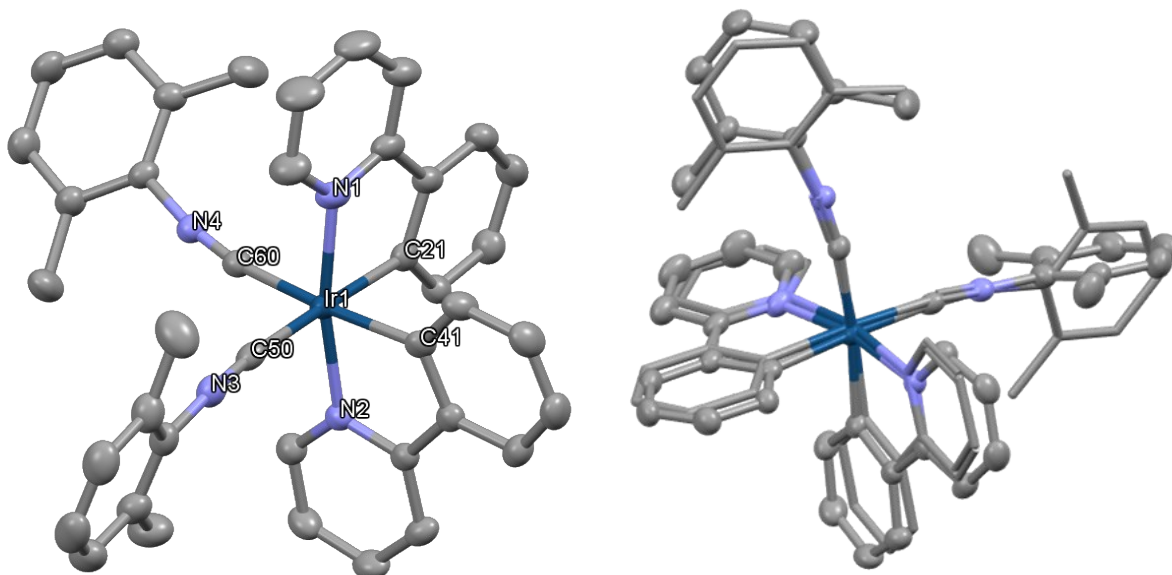

**Figure S21.** Crystal structure of  $[\text{Ir}(\text{ppy})_2(\text{dmpCN})_2]^+$  published previously in *Inorg. Chem.* **2016**, *55*, 2299–2308 (left), and overlay of crystal structure to optimized geometry at the M06/Def2-SVP/SDD level of theory (right).

**Table S1.** Comparison of optimized geometries using different hybrid functionals to the crystal structure  $[\text{Ir}(\text{ppy})_2(\text{dmpCN})_2]^+$  from *Inorg. Chem.* **2016**, *55*, 2299–2308.

|                              |                    | Crystal Structure | M06/Def2-SVP/SDD | B3LYP/Def2-SVP/SDD | PBE0/Def2-SVP/SDD |
|------------------------------|--------------------|-------------------|------------------|--------------------|-------------------|
| <b>Bond Length (Å)</b>       | <b>Ir1-C60</b>     | 2.023(3)          | 2.0471           | 2.0512             | 2.0202            |
|                              | <b>N4-C60</b>      | 1.151(4)          | 1.1724           | 1.1728             | 1.1708            |
|                              | <b>Ir1-N1</b>      | 2.060(3)          | 2.0922           | 2.1030             | 2.0764            |
|                              | <b>Ir1-C21</b>     | 2.052(4)          | 2.0725           | 2.0851             | 2.0659            |
|                              | <b>Ir1-C50</b>     | 2.012(4)          | 2.0455           | 2.0512             | 2.0202            |
|                              | <b>N3-C50</b>      | 1.155(5)          | 1.1724           | 1.1728             | 1.1708            |
|                              | <b>Ir1-N2</b>      | 2.061(3)          | 2.0915           | 2.1030             | 2.0764            |
|                              | <b>Ir1-C41</b>     | 2.048(3)          | 2.0721           | 2.0851             | 2.0659            |
| <b>Bond Angle (deg)</b>      | <b>C60-Ir1-C50</b> | 95.22(14)         | 98.97            | 96.19              | 96.88             |
|                              | <b>Ir1-C60-N4</b>  | 169.8(3)          | 173.17           | 175.64             | 175.52            |
|                              | <b>Ir1-C50-N3</b>  | 173.8(3)          | 172.08           | 175.63             | 175.52            |
| <b>Molecular Overlay (Å)</b> | <b>RMSD</b>        | ---               | 0.9573           | 1.0197             | 1.0439            |
|                              | <b>Max. D</b>      | ---               | 3.0118           | 2.9481             | 3.2894            |

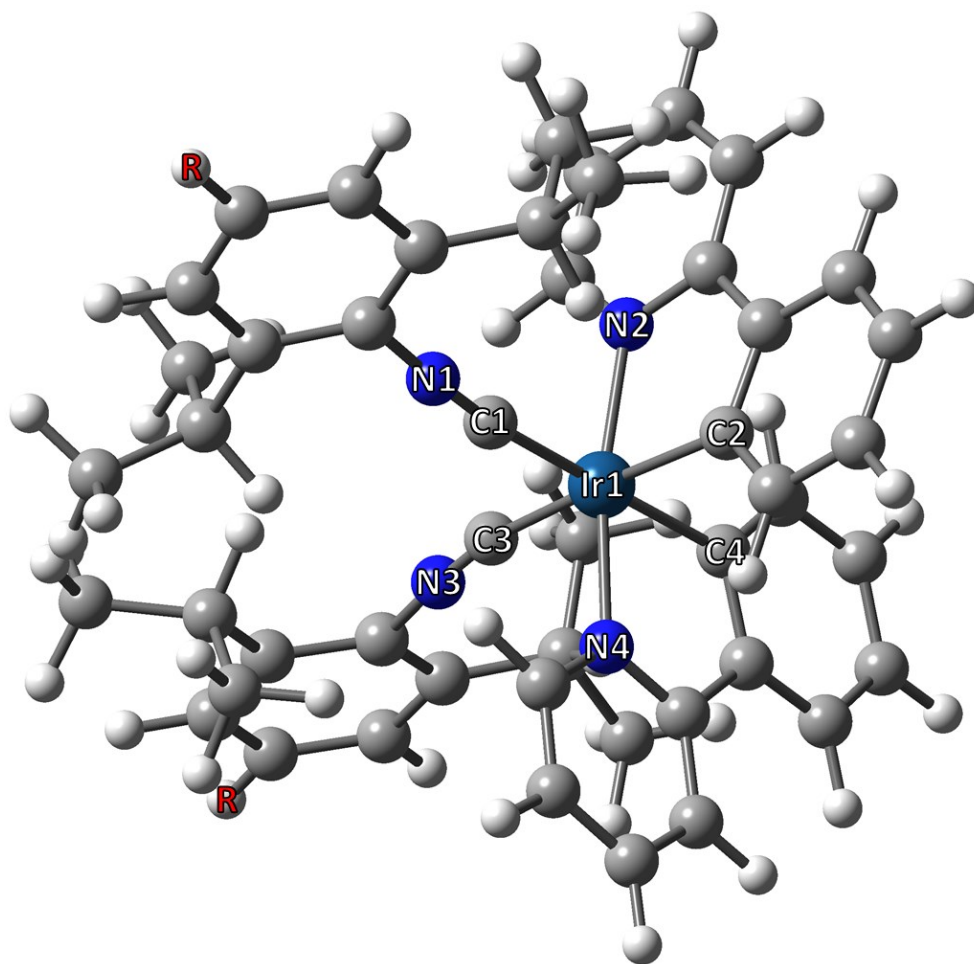

Figure S22. General molecular structure of the molecules in this study.

Table S2. Comparison of optimized geometries of the complexes in this study.

|                         |                  | 1      | 2      | 3      | 4      |
|-------------------------|------------------|--------|--------|--------|--------|
| <b>Bond Length (Å)</b>  | <b>Ir1-C1</b>    | 2.034  | 2.035  | 2.035  | 2.037  |
|                         | <b>N1-C1</b>     | 1.171  | 1.171  | 1.171  | 1.171  |
|                         | <b>Ir1-N2</b>    | 2.090  | 2.091  | 2.092  | 2.092  |
|                         | <b>Ir1-C2</b>    | 2.072  | 2.074  | 2.075  | 2.074  |
|                         | <b>Ir1-C3</b>    | 2.041  | 2.041  | 2.037  | 2.037  |
|                         | <b>N3-C3</b>     | 1.171  | 1.171  | 1.172  | 1.171  |
|                         | <b>Ir1-N4</b>    | 2.091  | 2.090  | 2.091  | 2.092  |
|                         | <b>Ir1-C4</b>    | 2.075  | 2.072  | 2.074  | 2.074  |
| <b>Bond Angle (deg)</b> | <b>C1-Ir1-C3</b> | 97.39  | 97.06  | 96.81  | 96.22  |
|                         | <b>Ir1-C1-N1</b> | 173.95 | 173.74 | 173.20 | 175.12 |
|                         | <b>Ir1-C3-N3</b> | 170.03 | 171.60 | 174.75 | 175.10 |

**Table S3.** Select frontier molecular orbital energies (eV) as determined at the PCM/M06/Def2-SVP/SDD level of theory.

|        | 1      | 2      | 3      | 4      |
|--------|--------|--------|--------|--------|
| LUMO+3 | -1.776 | -1.993 | -2.174 | -2.073 |
| LUMO+2 | -1.898 | -2.094 | -2.247 | -2.172 |
| LUMO+1 | -2.176 | -2.177 | -2.343 | -2.176 |
| LUMO   | -2.247 | -2.247 | -2.418 | -2.252 |
| HOMO   | -6.933 | -6.895 | -6.726 | -6.648 |
| HOMO-1 | -7.111 | -6.958 | -6.731 | -6.655 |
| HOMO-2 | -7.399 | -7.014 | -6.975 | -6.949 |
| HOMO-3 | -7.424 | -7.127 | -7.133 | -7.112 |

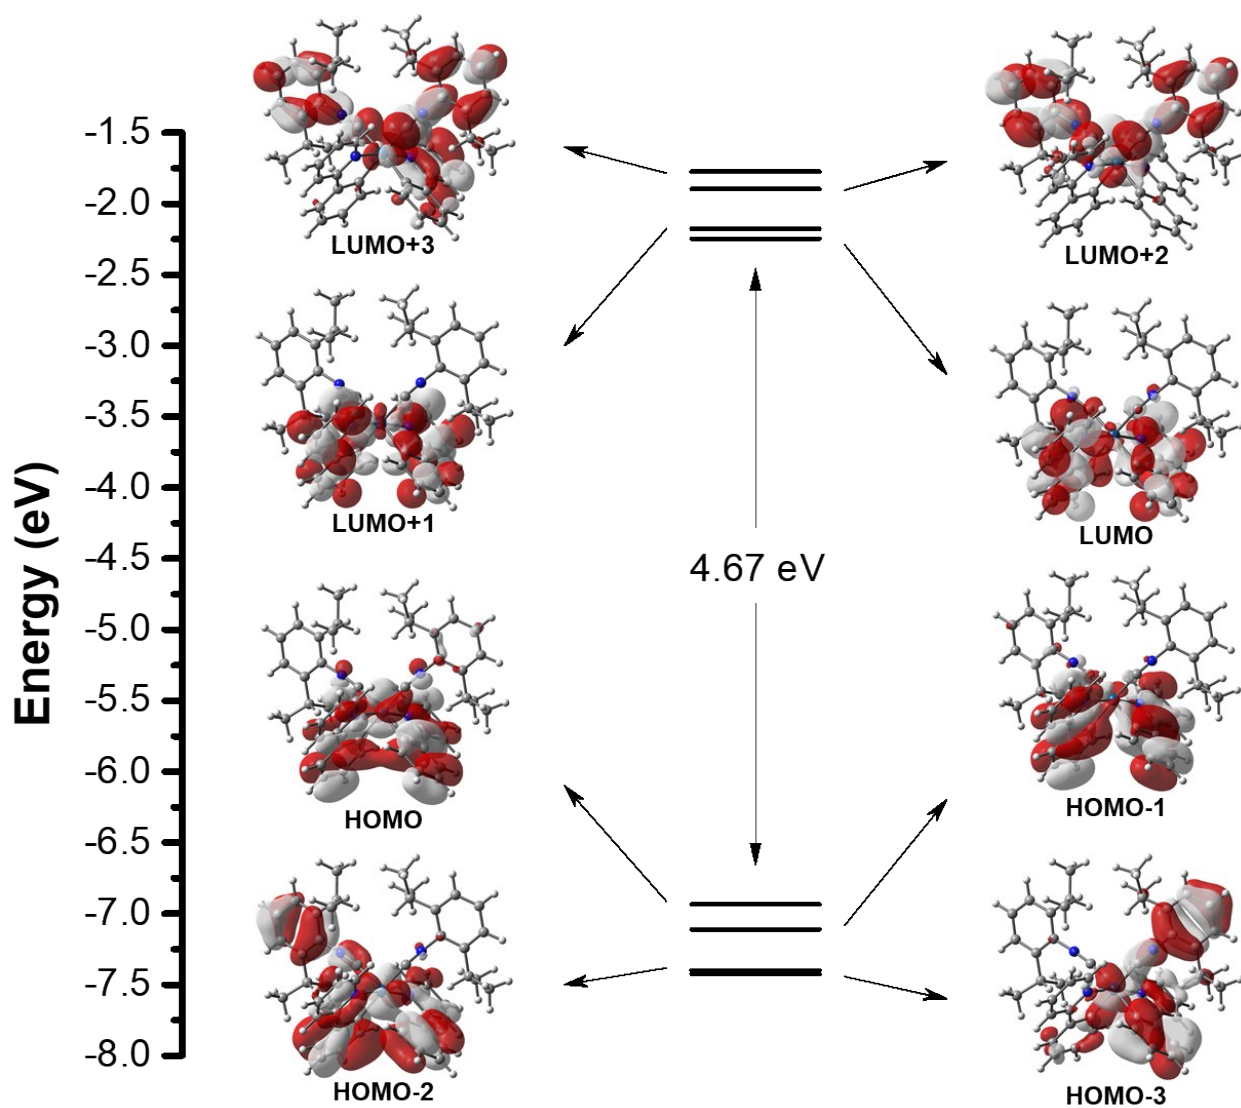

**Figure S23.** Frontier orbital diagram constructed for 1. Calculations performed at DFT//PCM/M06/Def2-SVP/SDD level of theory.

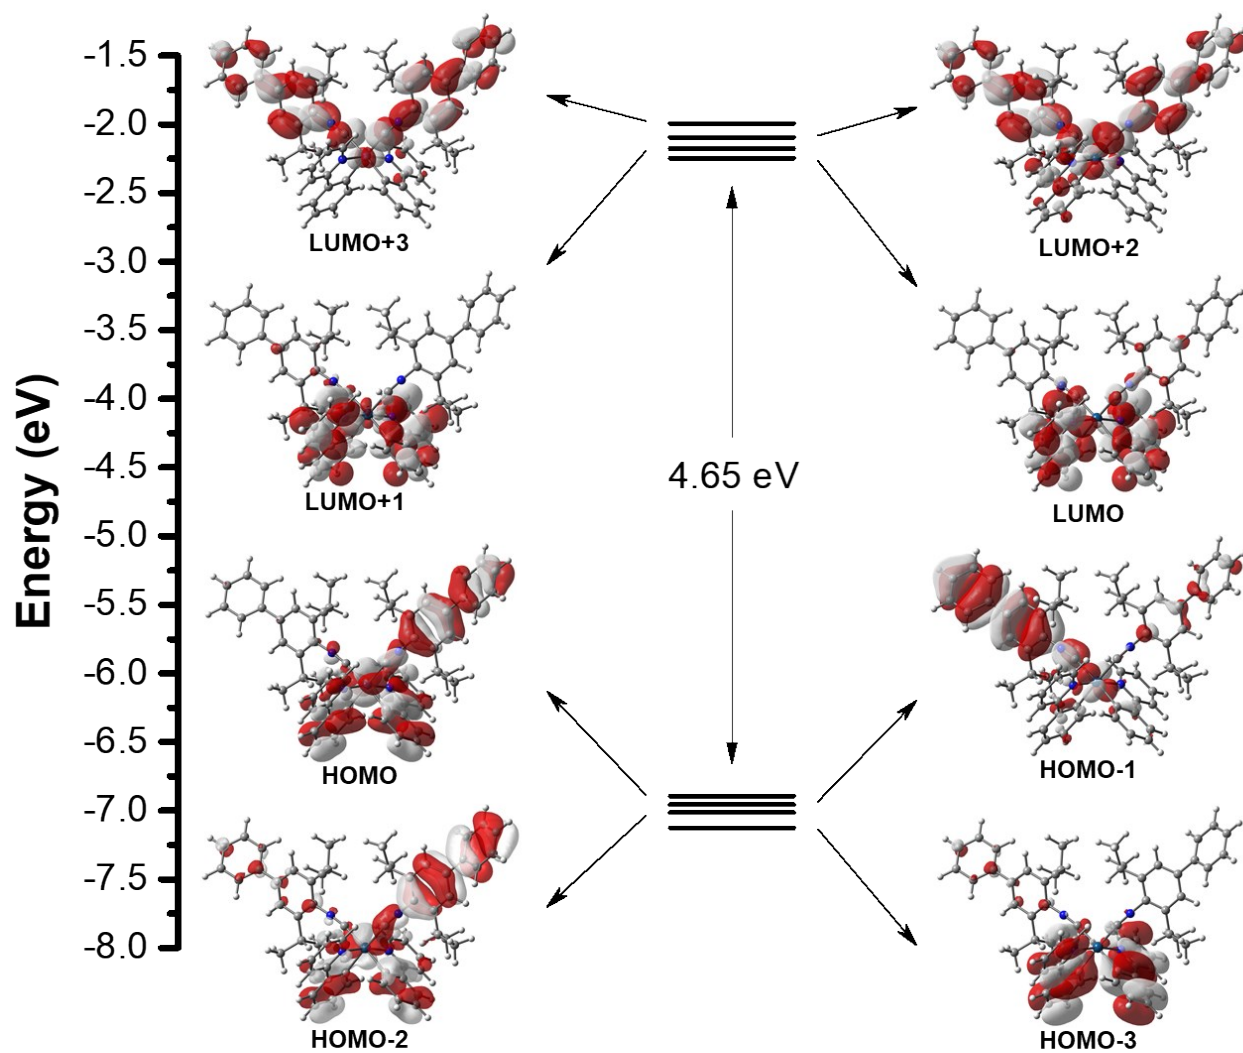

**Figure S24.** Frontier orbital diagram constructed for **2**. Calculations performed at DFT//PCM/M06/Def2-SVP/SDD level of theory.



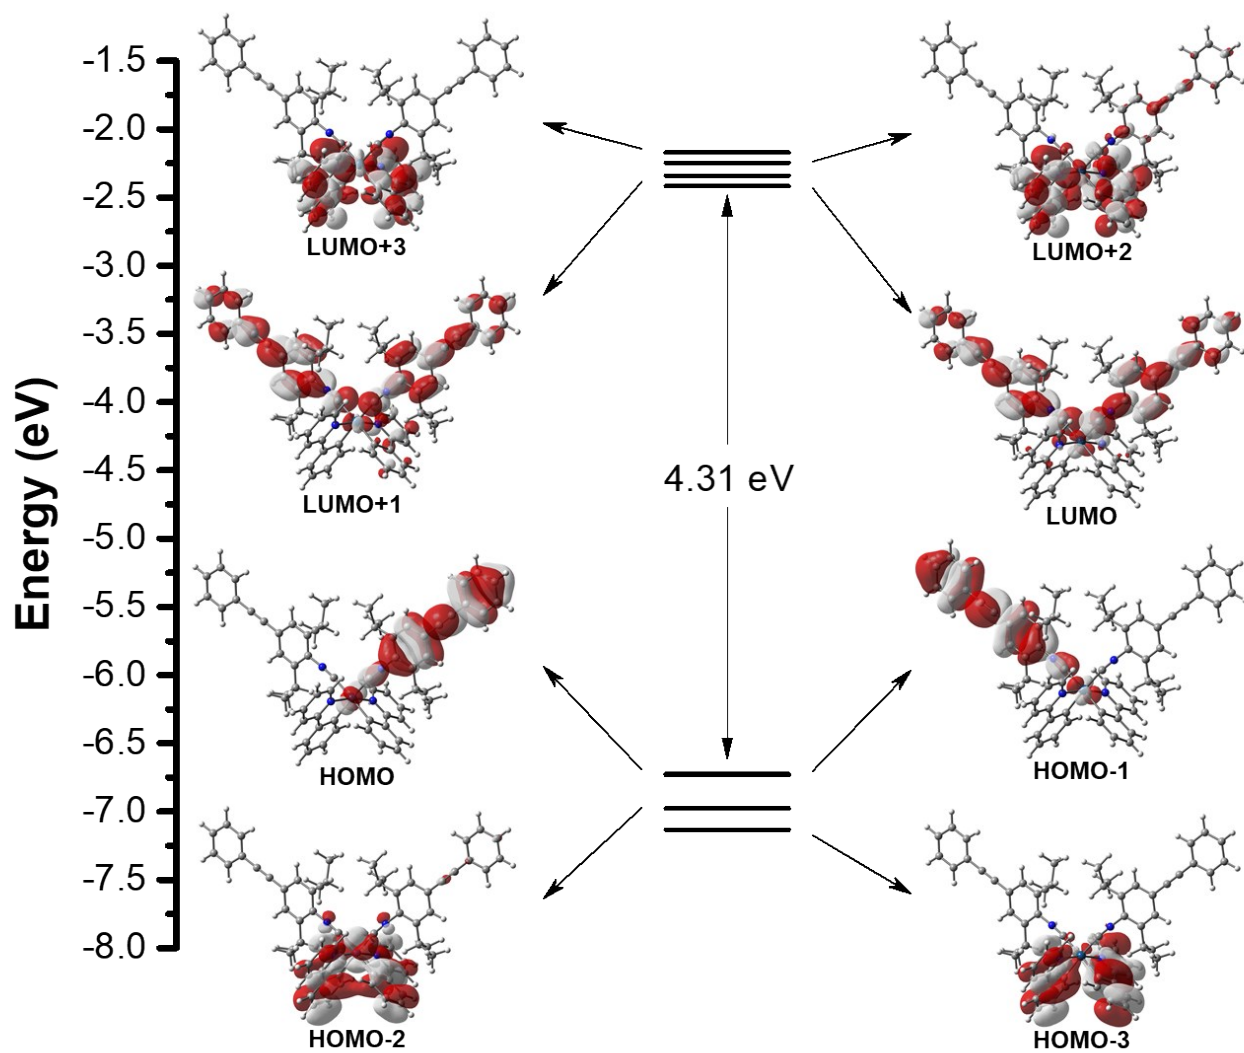

**Figure S25.** Frontier orbital diagram constructed for **3**. Calculations performed at DFT//PCM/M06/Def2-SVP/SDD level of theory.

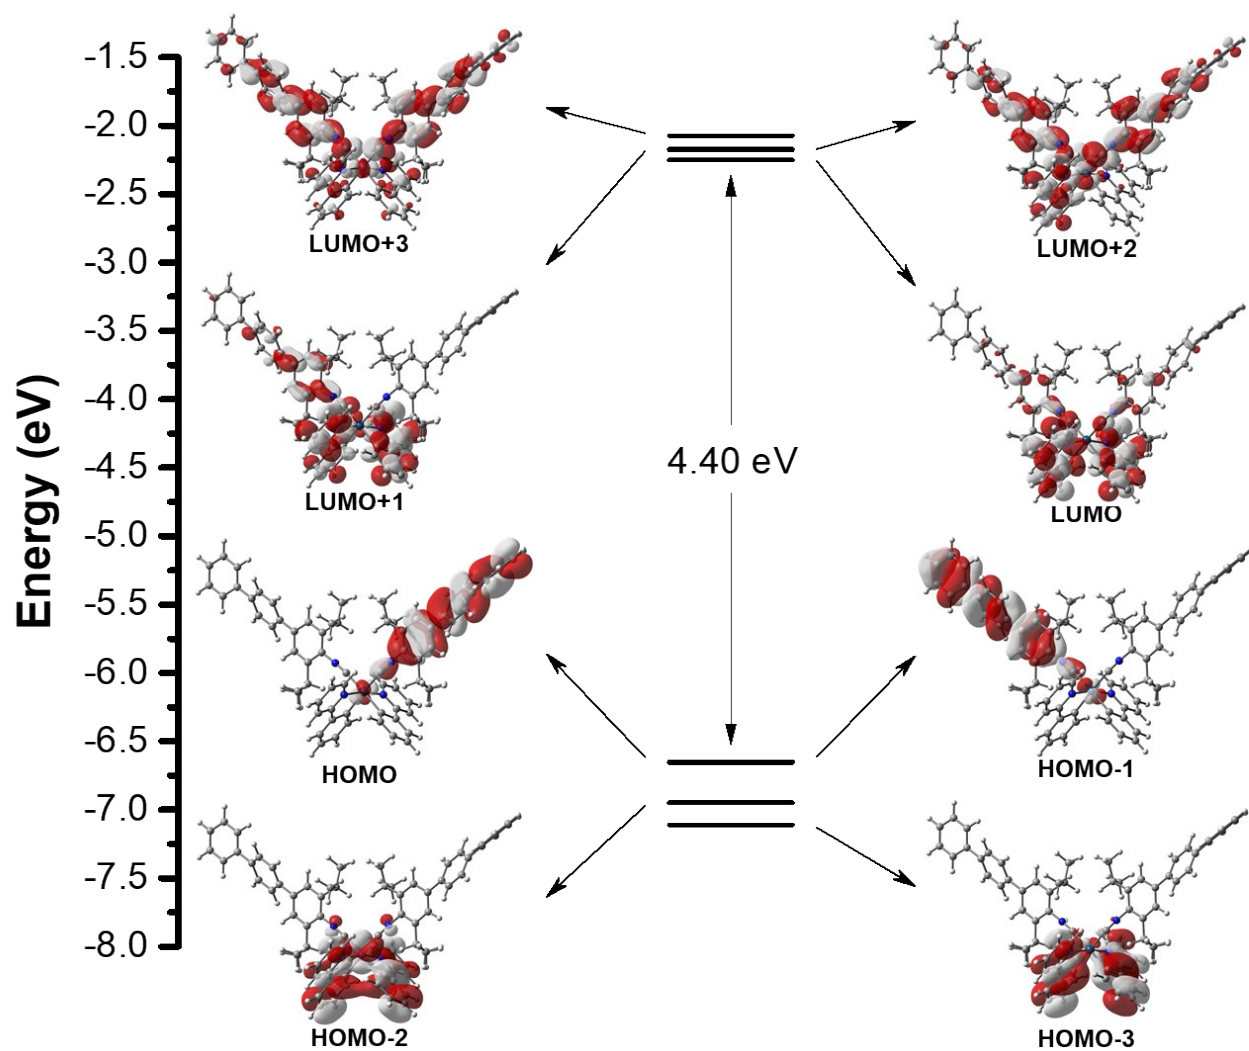

**Figure S26.** Frontier orbital diagram constructed for **4**. Calculations performed at DFT//PCM/M06/Def2-SVP/SDD level of theory.

**Table S4.** Wavelength, energies, and oscillator strength ( $f$ ) for selected  $S_0 \rightarrow S_n$  excitations as determined via TDDFT at the PCM/M06/Def2-SVP/SDD level of theory. Experimental UV/Vis data obtained in tetrahydrofuran at room temperature.

| Molecules | $\lambda_{\text{abs max}}$ /nm, eV<br>( $\epsilon/M^{-1} \text{ cm}^{-1}$ ) | $S_0 \rightarrow S_1$ /nm, eV ( $f$ ) | $S_0 \rightarrow T_1$ /nm, eV |
|-----------|-----------------------------------------------------------------------------|---------------------------------------|-------------------------------|
|           |                                                                             | $S_0 \rightarrow S_2$ /nm, eV ( $f$ ) | $S_0 \rightarrow T_2$ /nm, eV |
|           |                                                                             | $S_0 \rightarrow S_3$ /nm, eV ( $f$ ) | $S_0 \rightarrow T_3$ /nm, eV |
| <b>1</b>  | 346, 3.58 (8500)                                                            | 335, 3.70 (0.1281)                    | 433, 2.86                     |
|           |                                                                             | 330, 3.76 (0.0115)                    | 433, 2.87                     |
|           |                                                                             | 310, 4.00 (0.0281)                    | 385, 3.22                     |
| <b>2</b>  | 346, 3.58 (7900)                                                            | 335, 3.70 (0.1227)                    | 434, 2.86                     |
|           |                                                                             | 330, 3.76 (0.0060)                    | 434, 2.86                     |
|           |                                                                             | 315, 3.94 (1.0445)                    | 433, 2.86                     |
| <b>3</b>  | 352, 3.52 (8300)                                                            | 355, 3.49 (2.2984)                    | 506, 2.45                     |
|           |                                                                             | 346, 3.58 (1.0607)                    | 506, 2.45                     |
|           |                                                                             | 334, 3.71 (0.1596)                    | 433, 4.33                     |
| <b>4</b>  | 312, 3.97 (107400)                                                          | 339, 3.66 (2.0607)                    | 460, 2.69                     |
|           |                                                                             | 333, 3.72 (0.2719)                    | 459, 2.70                     |
|           |                                                                             | 332, 3.73 (0.9950)                    | 432, 2.87                     |

## Singlet Transitions

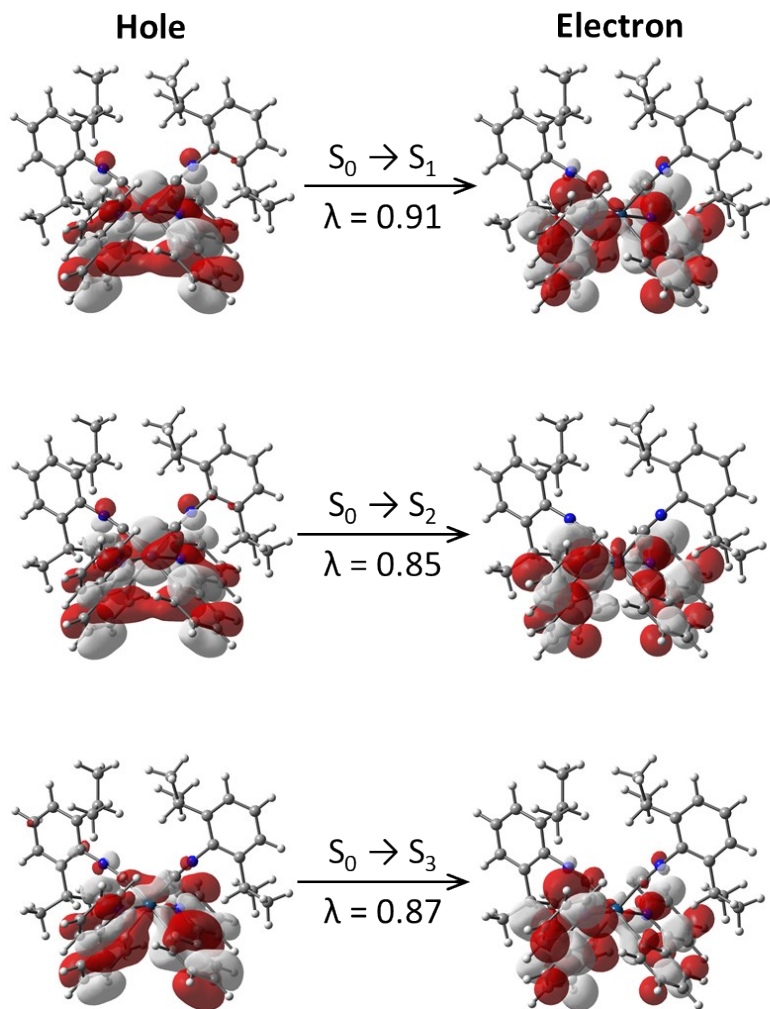

## Triplet Transitions

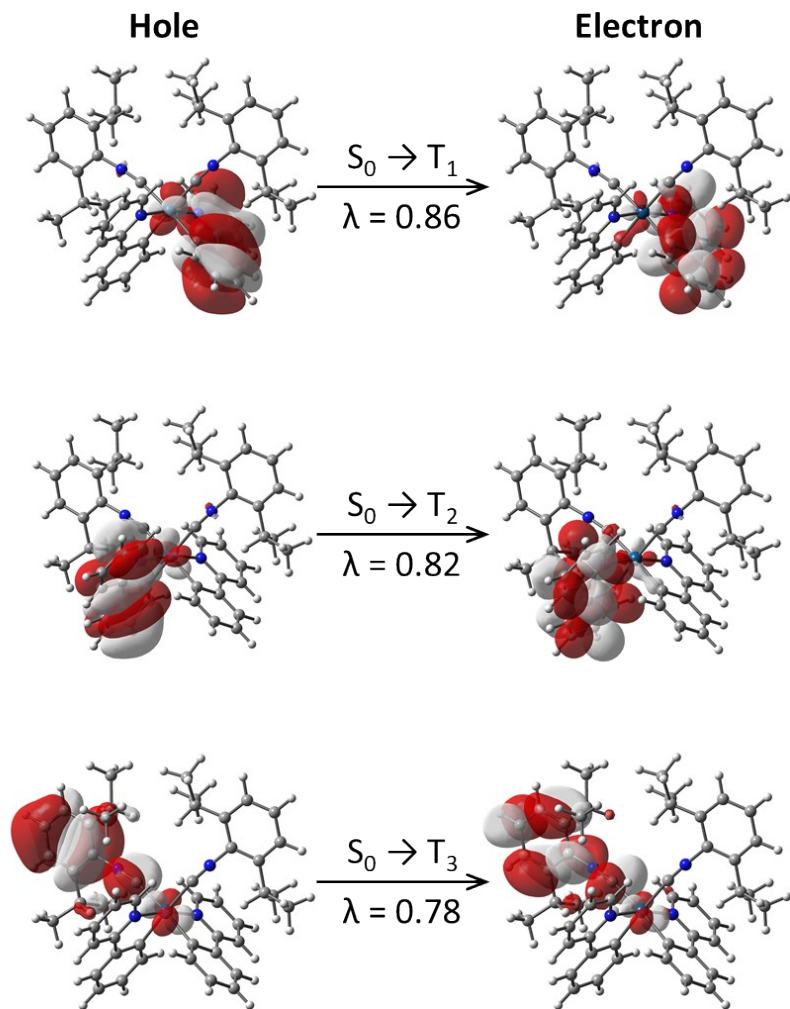

**Figure S27.** Natural transition orbitals (NTOs) for select  $S_0 \rightarrow S_n$  excitations (left) and select  $S_0 \rightarrow T_n$  excitations (right) of **1** determined at the TD-DFT//PCM/M06/Def2-SVP/SDD level of theory.  $\lambda$  is the fraction of the hole-particle contribution to the excitation.

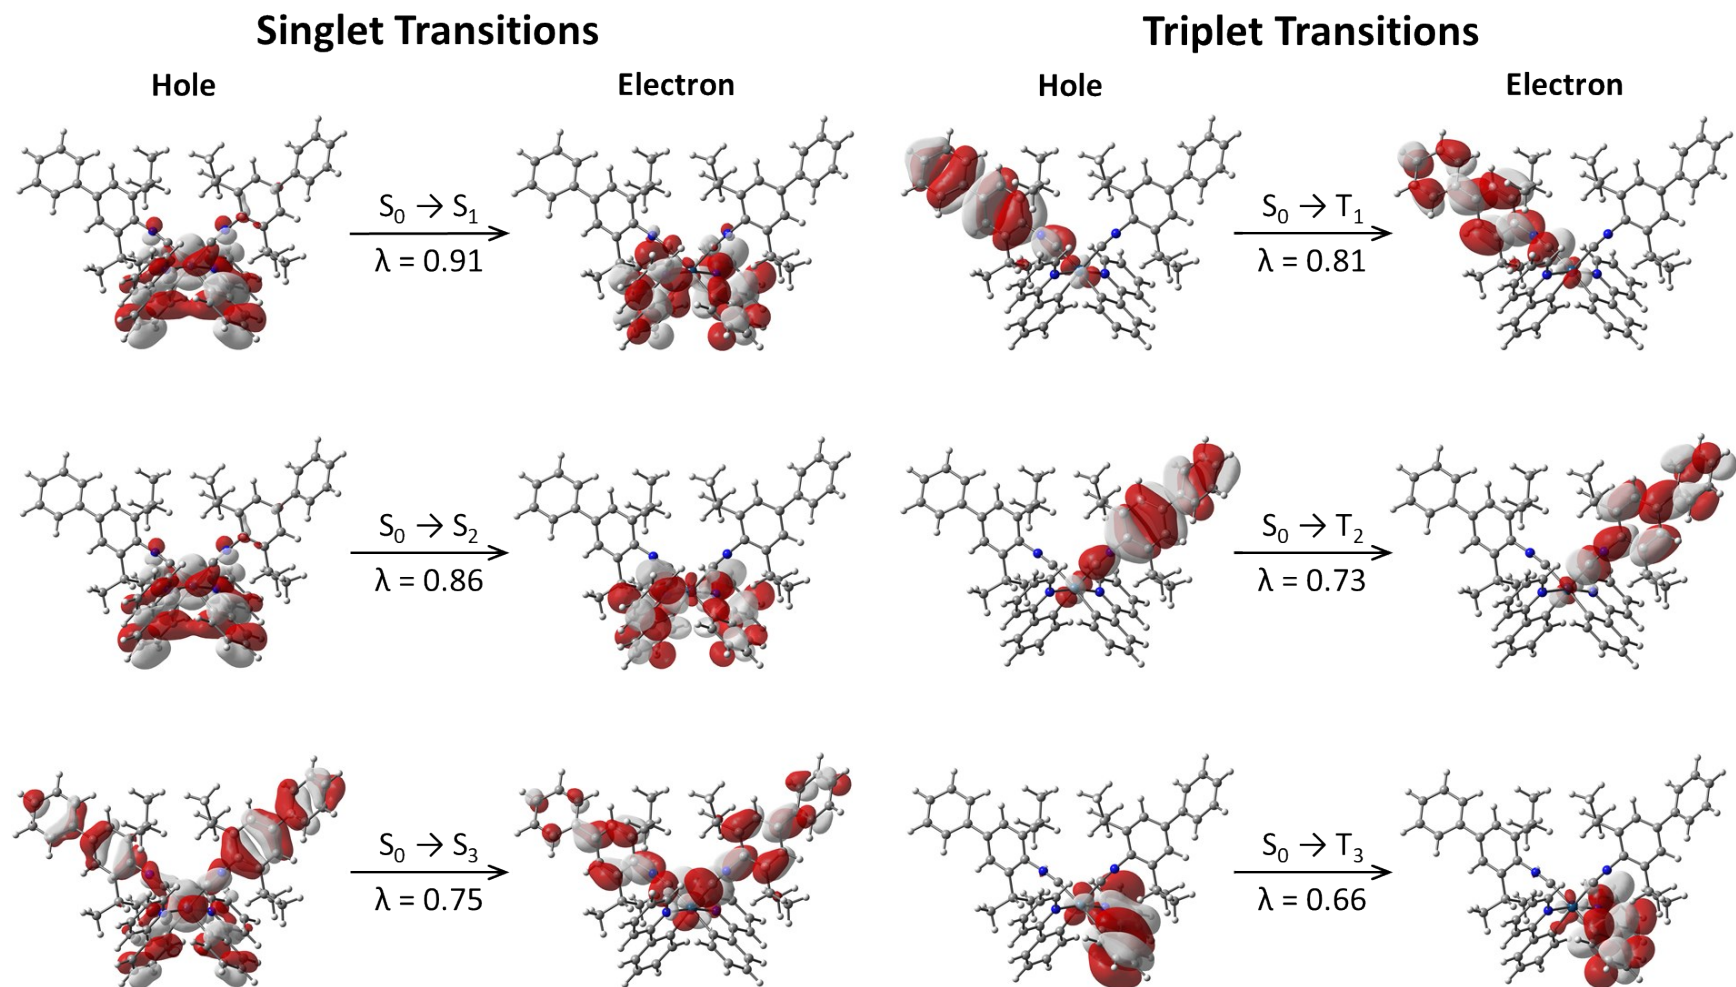

**Figure S28.** Natural transition orbitals (NTOs) for select  $S_0 \rightarrow S_n$  excitations (left) and select  $S_0 \rightarrow T_n$  excitations (right) of **2** determined at the TD-DFT//PCM/M06/Def2-SVP/SDD level of theory.  $\lambda$  is the fraction of the hole–particle contribution to the excitation.



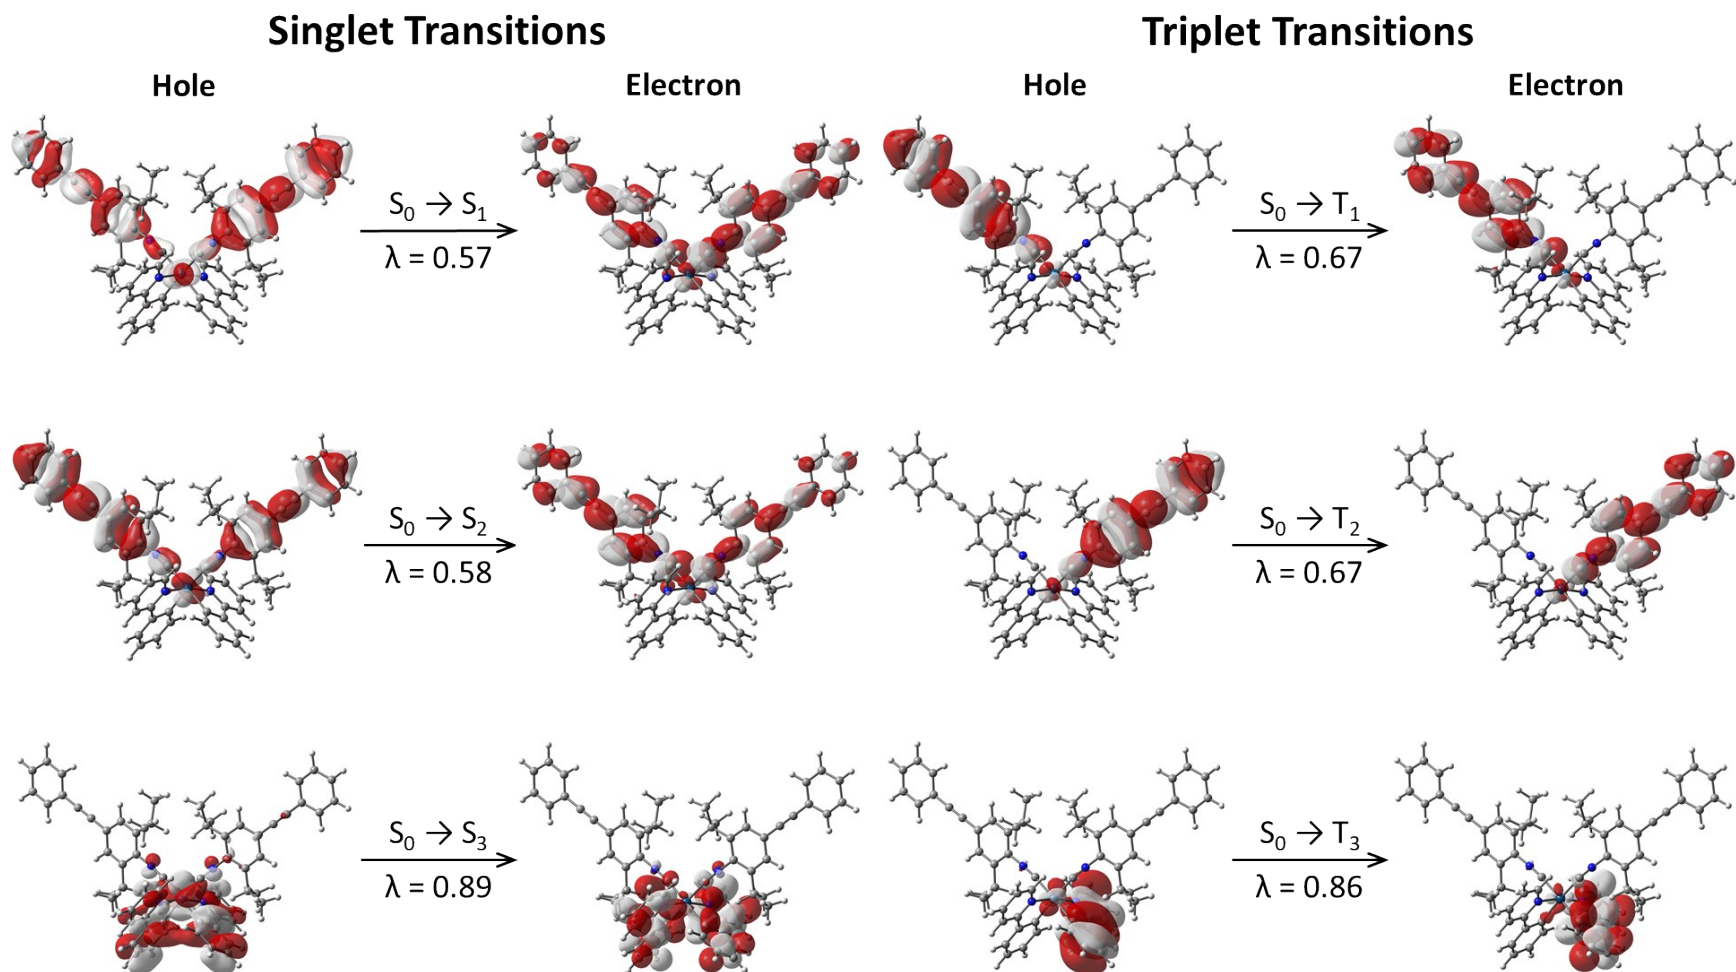

**Figure S29.** Natural transition orbitals (NTOs) for select  $S_0 \rightarrow S_n$  excitations (left) and select  $S_0 \rightarrow T_n$  excitations (right) of **3** determined at the TD-DFT//PCM/M06/Def2-SVP/SDD level of theory.  $\lambda$  is the fraction of the hole–particle contribution to the excitation.

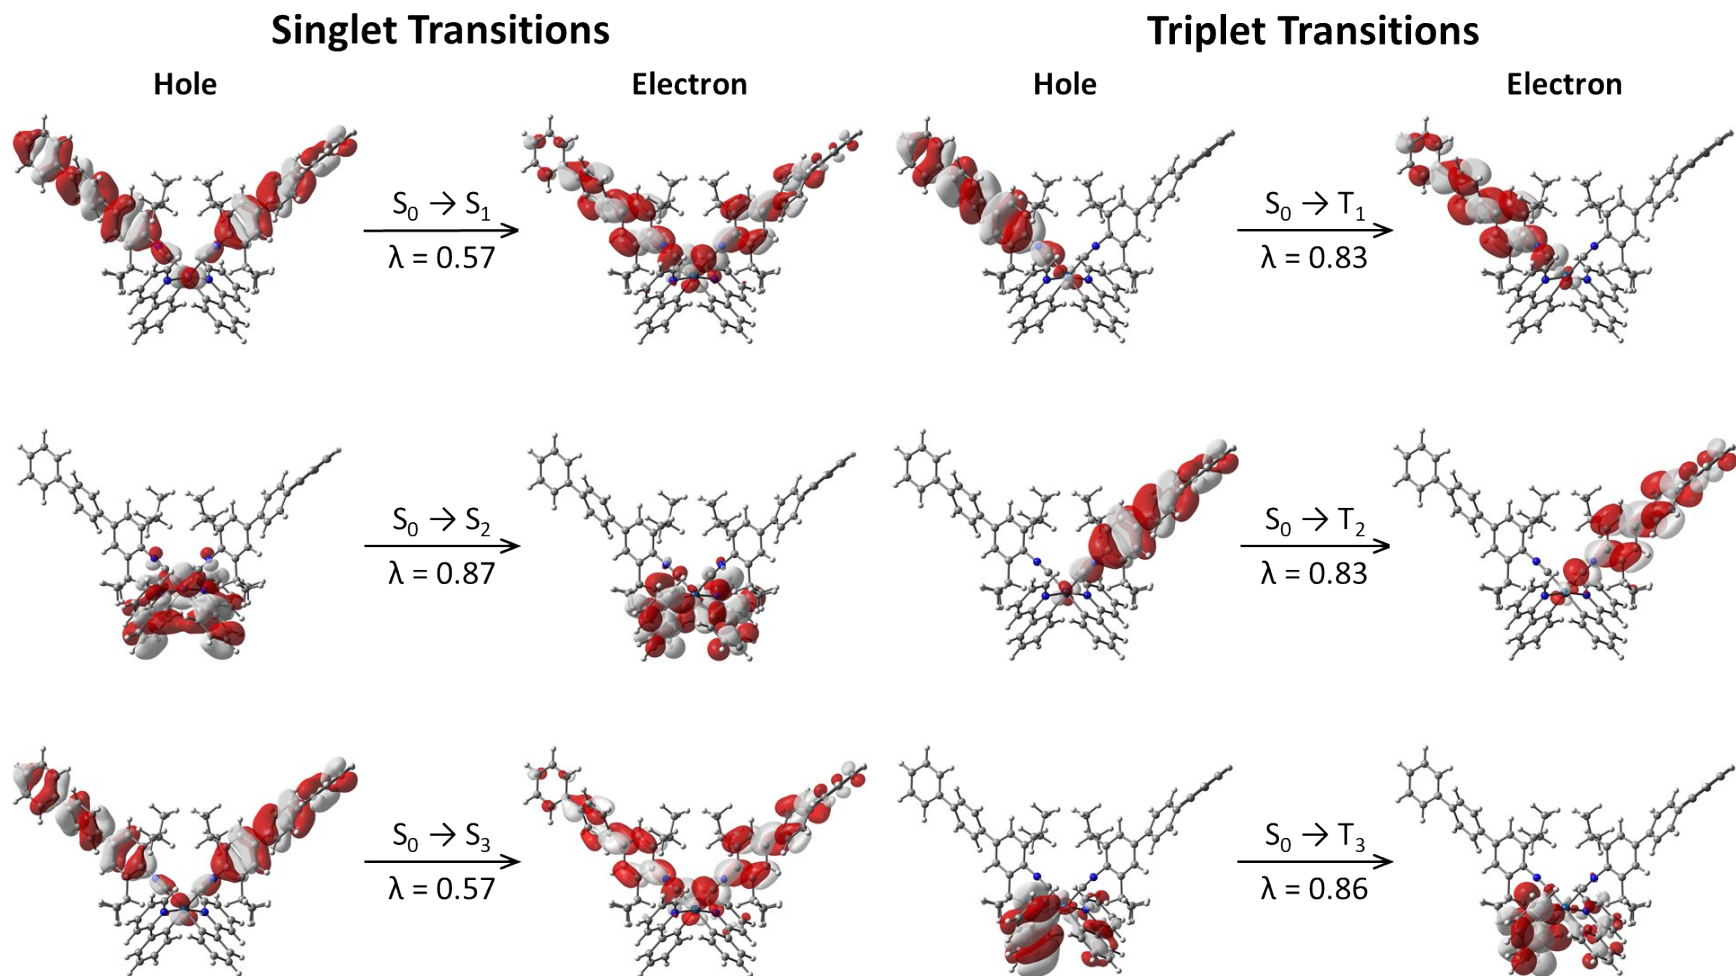

**Figure S30.** Natural transition orbitals (NTOs) for select  $S_0 \rightarrow S_n$  excitations (left) and select  $S_0 \rightarrow T_n$  excitations (right) of **4** determined at the TD-DFT//PCM/M06/Def2-SVP/SDD level of theory.  $\lambda$  is the fraction of the hole–particle contribution to the excitation.
